# Supplementary material for: Isolation, Characterization, and Safety Evaluation of the Novel Probiotic Strain Lacticaseibacillus paracasei IDCC 3401 via Genomic and Phenotypic Approaches
Source: MDPI journal article supplement (doi:10.3390/microorganisms12010085), 2023-12-31
Supplement: s1 [file s1]

## Supplementary Materials

**Table S1.** Pathogenic bacteria used in the study.

| Strain                                   | Culture condition                                         |
|------------------------------------------|-----------------------------------------------------------|
| <i>Staphylococcus aureus</i> ATCC 25923  | TSB medium (BD Difco), 37°C, 24 h, aerobic condition      |
| <i>Enterococcus faecalis</i> ATCC 29212  | BHI medium (BD Difco), 37°C, 24 h, aerobic condition      |
| <i>Bacillus cereus</i> ATCC 14579        | Nutrient medium (BD Difco), 30°C, 24 h, aerobic condition |
| <i>Salmonella</i> Typhimurium ATCC 13311 | Nutrient medium, 37°C, 24 h, aerobic condition            |

**Table S2.** Genomic information of *L. paracasei* IDCC 3401.

| <i>Lacticaseibacillus paracasei</i> IDCC 3401 |                                     |
|-----------------------------------------------|-------------------------------------|
| Identification                                | <i>Lacticaseibacillus paracasei</i> |
| Genome size (bp)                              | 2,995,875                           |
| GC contents (%)                               | 46.59                               |
| CDS                                           | 2938                                |
| ANI value (%)                                 | 98.27                               |

**Table S3.** Functional genes of *L. paracasei* IDCC 3401.

| <b>Eggnog</b> | <b>Description</b>                                            | <b>Count</b> | <b>Ratio (%)</b> |
|---------------|---------------------------------------------------------------|--------------|------------------|
| J             | Translation, ribosomal structure and biogenesis               | 178          | 9.3243           |
| A             | RNA processing and modification                               | 0            | 0.0000           |
| K             | Transcription                                                 | 224          | 11.7339          |
| L             | Replication, recombination and repair                         | 303          | 15.8722          |
| B             | Chromatin structure and dynamics                              | 0            | 0.0000           |
| D             | Cell cycle control, cell division, chromosome partitioning    | 40           | 2.0953           |
| Y             | Nuclear structure                                             | 0            | 0.0000           |
| V             | Defense mechanisms                                            | 105          | 5.5003           |
| T             | Signal transduction mechanisms                                | 50           | 2.6192           |
| M             | Cell wall/membrane/envelope biogenesis                        | 137          | 7.1765           |
| N             | Cell motility                                                 | 10           | 0.5238           |
| Z             | Cytoskeleton                                                  | 0            | 0.0000           |
| W             | Extracellular structures                                      | 0            | 0.0000           |
| U             | Intracellular trafficking, secretion, and vesicular transport | 40           | 2.0953           |
| O             | Posttranslational modification, protein turnover, chaperones  | 66           | 3.4573           |
| C             | Energy production and conversion                              | 130          | 6.8098           |
| G             | Carbohydrate transport and metabolism                         | 248          | 12.9911          |
| E             | Amino acid transport and metabolism                           | 224          | 11.7339          |
| F             | Nucleotide transport and metabolism                           | 128          | 6.7051           |
| H             | Coenzyme transport and metabolism                             | 60           | 3.1430           |
| I             | Lipid transport and metabolism                                | 62           | 3.2478           |
| P             | Inorganic ion transport and metabolism                        | 130          | 6.8098           |
| Q             | Secondary metabolites biosynthesis, transport and catabolism  | 18           | 0.9429           |
| R             | General function prediction only                              | 0            | 0.0000           |
| S             | Function unknown                                              | 830          | 43.4783          |
| Total         | -                                                             | 2,983        | 100              |

**Table S4.** Genes associated with antibiotic resistance.

|              | Detection |
|--------------|-----------|
| Vancomycin   | n.d.      |
| Ampicillin   | n.d.      |
| Clindamycin  | n.d.      |
| Erythromycin | n.d.      |
| Kanamycin    | n.d.      |

n.d.: not detected.

## Eggnog Proportion

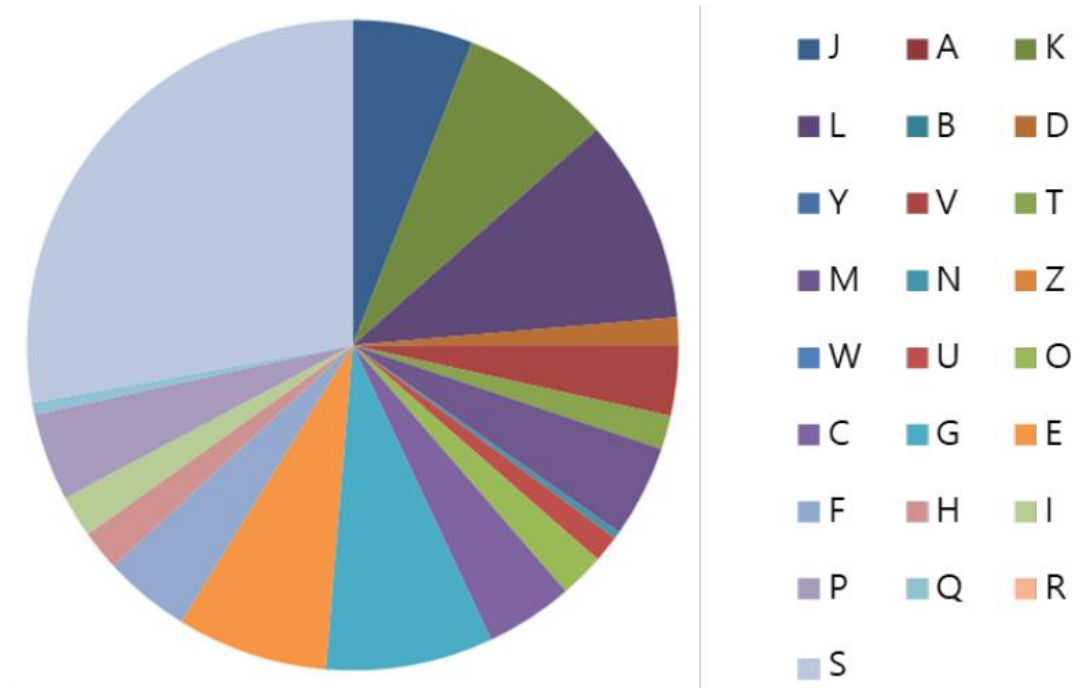

**Figure. S1.** Functional genes of *L. paracasei* IDCC 3401

Functional genes are analyzed by the eggNOG-mapper v2. J, translation, ribosomal structure and biogenesis; A, RNA processing and modification; K, transcription; L, replication, recombination, and repair; D, cell cycle control, cell division, chromosome partitioning; Y, nuclear structure; V, defense mechanisms; T, signal transduction mechanisms; M, cell wall/membrane/envelope biogenesis; N, cell motility; Z, cytoskeleton; W, extracellular structures; U, intracellular trafficking, secretion, and vesicular transport; O, posttranslational modification, protein turnover, and chaperones; C, energy production and conversion; G, carbohydrate transport and metabolism; E, amino acid transport and metabolism; F, nucleotide transport and metabolism; H, coenzyme transport and metabolism; I, lipid transport and metabolism; P, inorganic ion transport and metabolism; Q, secondary metabolite biosynthesis, transport, and catabolism; R, general function prediction only; S, function unknown.
